# Supplementary material for: A Novel Prognostic Signature Associated With the Tumor Microenvironment in Kidney Renal Clear Cell Carcinoma
Source: Front Oncol. 2022 Jul 4;12:912155. doi: 10.3389/fonc.2022.912155 (PMC9290677; doi:10.3389/fonc.2022.912155)
Supplement: Supplementary file 2 [file Table_2.xlsx]

## Sheet: Sheet1
!Sample_geo_accession	!Sample_status	!Sample_submission_date	!Sample_last_update_date	!Sample_type	!Sample_channel_count	!Sample_source_name_ch1	!Sample_organism_ch1	!Sample_characteristics_ch1	!Sample_characteristics_ch1	!Sample_characteristics_ch1	!Sample_characteristics_ch1	!Sample_characteristics_ch1	!Sample_characteristics_ch1	!Sample_characteristics_ch1	!Sample_characteristics_ch1	!Sample_characteristics_ch1	!Sample_characteristics_ch1	!Sample_characteristics_ch1	!Sample_characteristics_ch1	!Sample_characteristics_ch1	!Sample_characteristics_ch1	!Sample_characteristics_ch1	!Sample_characteristics_ch1	!Sample_characteristics_ch1	!Sample_treatment_protocol_ch1	!Sample_molecule_ch1	!Sample_extract_protocol_ch1	!Sample_label_ch1	!Sample_label_protocol_ch1	!Sample_taxid_ch1	!Sample_source_name_ch2	!Sample_organism_ch2	!Sample_characteristics_ch2	!Sample_characteristics_ch2	!Sample_treatment_protocol_ch2	!Sample_molecule_ch2	!Sample_extract_protocol_ch2	!Sample_label_ch2	!Sample_label_protocol_ch2	!Sample_taxid_ch2	!Sample_hyb_protocol	!Sample_scan_protocol	!Sample_scan_protocol	!Sample_data_processing	!Sample_platform_id	!Sample_contact_name	!Sample_contact_email	!Sample_contact_department	!Sample_contact_institute
GSM733579	Public on May 28 2011	May 27 2011	Jun 26 2011	RNA	2	Clear-cell renal cell carcinoma AV D	Homo sapiens	age at diagnosis (y): 43	t (tnm stage): 4	n (tnm stage): 0	m (tnm stage): 1	fuhrman grade: 4	renal vein involvement: 1	inferior vena cava involvement: 0	peri-nephric fat involvement: 1	sarcomatoid component: 1	tumor necrosis: 0	microvascular invasion: 1	microvascular density (mvd): 31	progression (1=yes, 0=no): 1	death (1=yes, 0=no): 1	death from cancer (1=yes, 0=no): 1	tissue: Clear-cell renal cell carcinoma	survival time: 16	Immediately after nephrectomy, a sample was taken from the tumor and frozen in liquid nitrogen	total RNA	Total RNA was extracted from snap-frozen tumours using the Qiamp total RNA kit - PN 74104 -QIAGEN, Hilden, Germany after histological control.	Cy3	cRNA were amplified from 350 ng of total RNA were amplified and fluorescent cDNA were synthesis from cRNA using the kit Agilent Low RNA Input Fluorescent Linear Amplification Kit - PN 5184-3523 - Agilent Technologies	9606	Total RNA from pooled tumor RNA samples	Homo sapiens	sample type: Total RNA from pooled tumor RNA samples	tissue: Clear-cell renal cell carcinoma	Immediately after nephrectomy, a sample was taken from the tumor and frozen in liquid nitrogen	total RNA	Total RNA was extracted from snap-frozen tumours using the Qiamp total RNA kit - PN 74104 -QIAGEN, Hilden, Germany after histological control.	Cy5	cRNA were amplified from 350 ng of total RNA were amplified and fluorescent cDNA were synthesis from cRNA using the kit Agilent Low RNA Input Fluorescent Linear Amplification Kit - PN 5184-3523 - Agilent Technologies	9606	750 ng of the two cDNA labelled Cyanine 3 and Cyanine 5 were hybridizated using the kit In-Situ Hybridization Kit Plus - PN 5184-3568 - Agilent Technologies	Agilent Technologies Scanner G2505B US22502565 Agilent Technologies Scanner G2505B US22502565	Images were quantified using Agilent Feature Extraction Software (version A.8.5.1.1).	Agilent Feature Extraction Software (v 8.5.1.1) was used for background subtraction and LOWESS normalization.	GPL1708	Julien,,Edeline	j.edeline@rennes.fnclcc.fr	UMR 6061	CNRS-Universit茅 Rennes1
GSM733580	Public on May 28 2011	May 27 2011	Jun 26 2011	RNA	2	Clear-cell renal cell carcinoma BA B	Homo sapiens	age at diagnosis (y): 52	t (tnm stage): 3	n (tnm stage): 0	m (tnm stage): 0	fuhrman grade: 3	renal vein involvement: 0	inferior vena cava involvement: 0	peri-nephric fat involvement: 1	sarcomatoid component: 0	tumor necrosis: 0	microvascular invasion: 1	microvascular density (mvd): 31	progression (1=yes, 0=no): 1	death (1=yes, 0=no): 1	death from cancer (1=yes, 0=no): 1	survival time: 40	tissue: Clear-cell renal cell carcinoma	Immediately after nephrectomy, a sample was taken from the tumor and frozen in liquid nitrogen	total RNA	Total RNA was extracted from snap-frozen tumours using the Qiamp total RNA kit - PN 74104 -QIAGEN, Hilden, Germany after histological control.	Cy3	cRNA were amplified from 350 ng of total RNA were amplified and fluorescent cDNA were synthesis from cRNA using the kit Agilent Low RNA Input Fluorescent Linear Amplification Kit - PN 5184-3523 - Agilent Technologies	9606	Total RNA from pooled tumor RNA samples	Homo sapiens	sample type: Total RNA from pooled tumor RNA samples	tissue: Clear-cell renal cell carcinoma	Immediately after nephrectomy, a sample was taken from the tumor and frozen in liquid nitrogen	total RNA	Total RNA was extracted from snap-frozen tumours using the Qiamp total RNA kit - PN 74104 -QIAGEN, Hilden, Germany after histological control.	Cy5	cRNA were amplified from 350 ng of total RNA were amplified and fluorescent cDNA were synthesis from cRNA using the kit Agilent Low RNA Input Fluorescent Linear Amplification Kit - PN 5184-3523 - Agilent Technologies	9606	750 ng of the two cDNA labelled Cyanine 3 and Cyanine 5 were hybridizated using the kit In-Situ Hybridization Kit Plus - PN 5184-3568 - Agilent Technologies	Agilent Technologies Scanner G2505B US22502565 Agilent Technologies Scanner G2505B US22502565	Images were quantified using Agilent Feature Extraction Software (version A.8.5.1.1).	Agilent Feature Extraction Software (v 8.5.1.1) was used for background subtraction and LOWESS normalization.	GPL1708	Julien,,Edeline	j.edeline@rennes.fnclcc.fr	UMR 6061	CNRS-Universit茅 Rennes1
GSM733581	Public on May 28 2011	May 27 2011	Jun 26 2011	RNA	2	Clear-cell renal cell carcinoma BA G	Homo sapiens	age at diagnosis (y): 67	t (tnm stage): 1	n (tnm stage): 0	m (tnm stage): 0	fuhrman grade: 2	renal vein involvement: 0	peri-nephric fat involvement: 0	sarcomatoid component: 0	tumor necrosis: 0	microvascular invasion: 0	progression (1=yes, 0=no): 1	death (1=yes, 0=no): 0	death from cancer (1=yes, 0=no): 0	survival time: 31	tissue: Clear-cell renal cell carcinoma			Immediately after nephrectomy, a sample was taken from the tumor and frozen in liquid nitrogen	total RNA	Total RNA was extracted from snap-frozen tumours using the Qiamp total RNA kit - PN 74104 -QIAGEN, Hilden, Germany after histological control.	Cy3	cRNA were amplified from 350 ng of total RNA were amplified and fluorescent cDNA were synthesis from cRNA using the kit Agilent Low RNA Input Fluorescent Linear Amplification Kit - PN 5184-3523 - Agilent Technologies	9606	Total RNA from pooled tumor RNA samples	Homo sapiens	sample type: Total RNA from pooled tumor RNA samples	tissue: Clear-cell renal cell carcinoma	Immediately after nephrectomy, a sample was taken from the tumor and frozen in liquid nitrogen	total RNA	Total RNA was extracted from snap-frozen tumours using the Qiamp total RNA kit - PN 74104 -QIAGEN, Hilden, Germany after histological control.	Cy5	cRNA were amplified from 350 ng of total RNA were amplified and fluorescent cDNA were synthesis from cRNA using the kit Agilent Low RNA Input Fluorescent Linear Amplification Kit - PN 5184-3523 - Agilent Technologies	9606	750 ng of the two cDNA labelled Cyanine 3 and Cyanine 5 were hybridizated using the kit In-Situ Hybridization Kit Plus - PN 5184-3568 - Agilent Technologies	Agilent Technologies Scanner G2505B US22502565 Agilent Technologies Scanner G2505B US22502565	Images were quantified using Agilent Feature Extraction Software (version A.8.5.1.1).	Agilent Feature Extraction Software (v 8.5.1.1) was used for background subtraction and LOWESS normalization.	GPL1708	Julien,,Edeline	j.edeline@rennes.fnclcc.fr	UMR 6061	CNRS-Universit茅 Rennes1
GSM733582	Public on May 28 2011	May 27 2011	Jun 26 2011	RNA	2	Clear-cell renal cell carcinoma BO G	Homo sapiens	age at diagnosis (y): 64	t (tnm stage): 3	n (tnm stage): 1	m (tnm stage): 0	fuhrman grade: 3	renal vein involvement: 1	inferior vena cava involvement: 1	peri-nephric fat involvement: 1	sarcomatoid component: 0	tumor necrosis: 1	microvascular invasion: 1	microvascular density (mvd): 29	progression (1=yes, 0=no): 1	death (1=yes, 0=no): 1	death from cancer (1=yes, 0=no): 1	survival time: 1	tissue: Clear-cell renal cell carcinoma	Immediately after nephrectomy, a sample was taken from the tumor and frozen in liquid nitrogen	total RNA	Total RNA was extracted from snap-frozen tumours using the Qiamp total RNA kit - PN 74104 -QIAGEN, Hilden, Germany after histological control.	Cy3	cRNA were amplified from 350 ng of total RNA were amplified and fluorescent cDNA were synthesis from cRNA using the kit Agilent Low RNA Input Fluorescent Linear Amplification Kit - PN 5184-3523 - Agilent Technologies	9606	Total RNA from pooled tumor RNA samples	Homo sapiens	sample type: Total RNA from pooled tumor RNA samples	tissue: Clear-cell renal cell carcinoma	Immediately after nephrectomy, a sample was taken from the tumor and frozen in liquid nitrogen	total RNA	Total RNA was extracted from snap-frozen tumours using the Qiamp total RNA kit - PN 74104 -QIAGEN, Hilden, Germany after histological control.	Cy5	cRNA were amplified from 350 ng of total RNA were amplified and fluorescent cDNA were synthesis from cRNA using the kit Agilent Low RNA Input Fluorescent Linear Amplification Kit - PN 5184-3523 - Agilent Technologies	9606	750 ng of the two cDNA labelled Cyanine 3 and Cyanine 5 were hybridizated using the kit In-Situ Hybridization Kit Plus - PN 5184-3568 - Agilent Technologies	Agilent Technologies Scanner G2505B US22502565 Agilent Technologies Scanner G2505B US22502565	Images were quantified using Agilent Feature Extraction Software (version A.8.5.1.1).	Agilent Feature Extraction Software (v 8.5.1.1) was used for background subtraction and LOWESS normalization.	GPL1708	Julien,,Edeline	j.edeline@rennes.fnclcc.fr	UMR 6061	CNRS-Universit茅 Rennes1
GSM733583	Public on May 28 2011	May 27 2011	Jun 26 2011	RNA	2	Clear-cell renal cell carcinoma BO V	Homo sapiens	age at diagnosis (y): 54	t (tnm stage): 1	n (tnm stage): 0	m (tnm stage): 0	fuhrman grade: 2	renal vein involvement: 0	inferior vena cava involvement: 0	peri-nephric fat involvement: 0	sarcomatoid component: 0	tumor necrosis: 0	microvascular invasion: 0	progression (1=yes, 0=no): 0	death (1=yes, 0=no): 0	death from cancer (1=yes, 0=no): 0	survival time: 26	tissue: Clear-cell renal cell carcinoma		Immediately after nephrectomy, a sample was taken from the tumor and frozen in liquid nitrogen	total RNA	Total RNA was extracted from snap-frozen tumours using the Qiamp total RNA kit - PN 74104 -QIAGEN, Hilden, Germany after histological control.	Cy3	cRNA were amplified from 350 ng of total RNA were amplified and fluorescent cDNA were synthesis from cRNA using the kit Agilent Low RNA Input Fluorescent Linear Amplification Kit - PN 5184-3523 - Agilent Technologies	9606	Total RNA from pooled tumor RNA samples	Homo sapiens	sample type: Total RNA from pooled tumor RNA samples	tissue: Clear-cell renal cell carcinoma	Immediately after nephrectomy, a sample was taken from the tumor and frozen in liquid nitrogen	total RNA	Total RNA was extracted from snap-frozen tumours using the Qiamp total RNA kit - PN 74104 -QIAGEN, Hilden, Germany after histological control.	Cy5	cRNA were amplified from 350 ng of total RNA were amplified and fluorescent cDNA were synthesis from cRNA using the kit Agilent Low RNA Input Fluorescent Linear Amplification Kit - PN 5184-3523 - Agilent Technologies	9606	750 ng of the two cDNA labelled Cyanine 3 and Cyanine 5 were hybridizated using the kit In-Situ Hybridization Kit Plus - PN 5184-3568 - Agilent Technologies	Agilent Technologies Scanner G2505B US22502565 Agilent Technologies Scanner G2505B US22502565	Images were quantified using Agilent Feature Extraction Software (version A.8.5.1.1).	Agilent Feature Extraction Software (v 8.5.1.1) was used for background subtraction and LOWESS normalization.	GPL1708	Julien,,Edeline	j.edeline@rennes.fnclcc.fr	UMR 6061	CNRS-Universit茅 Rennes1
GSM733584	Public on May 28 2011	May 27 2011	Jun 26 2011	RNA	2	Clear-cell renal cell carcinoma BO M	Homo sapiens	age at diagnosis (y): 21	t (tnm stage): 3	n (tnm stage): 2	m (tnm stage): 1	fuhrman grade: 4	renal vein involvement: 1	inferior vena cava involvement: 0	peri-nephric fat involvement: 1	sarcomatoid component: 0	tumor necrosis: 1	microvascular invasion: 1	microvascular density (mvd): 15	progression (1=yes, 0=no): 1	death (1=yes, 0=no): 1	death from cancer (1=yes, 0=no): 1	survival time: 45	tissue: Clear-cell renal cell carcinoma	Immediately after nephrectomy, a sample was taken from the tumor and frozen in liquid nitrogen	total RNA	Total RNA was extracted from snap-frozen tumours using the Qiamp total RNA kit - PN 74104 -QIAGEN, Hilden, Germany after histological control.	Cy3	cRNA were amplified from 350 ng of total RNA were amplified and fluorescent cDNA were synthesis from cRNA using the kit Agilent Low RNA Input Fluorescent Linear Amplification Kit - PN 5184-3523 - Agilent Technologies	9606	Total RNA from pooled tumor RNA samples	Homo sapiens	sample type: Total RNA from pooled tumor RNA samples	tissue: Clear-cell renal cell carcinoma	Immediately after nephrectomy, a sample was taken from the tumor and frozen in liquid nitrogen	total RNA	Total RNA was extracted from snap-frozen tumours using the Qiamp total RNA kit - PN 74104 -QIAGEN, Hilden, Germany after histological control.	Cy5	cRNA were amplified from 350 ng of total RNA were amplified and fluorescent cDNA were synthesis from cRNA using the kit Agilent Low RNA Input Fluorescent Linear Amplification Kit - PN 5184-3523 - Agilent Technologies	9606	750 ng of the two cDNA labelled Cyanine 3 and Cyanine 5 were hybridizated using the kit In-Situ Hybridization Kit Plus - PN 5184-3568 - Agilent Technologies	Agilent Technologies Scanner G2505B US22502565 Agilent Technologies Scanner G2505B US22502565	Images were quantified using Agilent Feature Extraction Software (version A.8.5.1.1).	Agilent Feature Extraction Software (v 8.5.1.1) was used for background subtraction and LOWESS normalization.	GPL1708	Julien,,Edeline	j.edeline@rennes.fnclcc.fr	UMR 6061	CNRS-Universit茅 Rennes1
GSM733585	Public on May 28 2011	May 27 2011	Jun 26 2011	RNA	2	Clear-cell renal cell carcinoma BR M	Homo sapiens	age at diagnosis (y): 49	t (tnm stage): 3	n (tnm stage): 0	m (tnm stage): 0	fuhrman grade: 3	renal vein involvement: 1	inferior vena cava involvement: 1	peri-nephric fat involvement: 0	sarcomatoid component: 0	tumor necrosis: 1	microvascular invasion: 1	progression (1=yes, 0=no): 1	death (1=yes, 0=no): 0	death from cancer (1=yes, 0=no): 0	survival time: 44	tissue: Clear-cell renal cell carcinoma		Immediately after nephrectomy, a sample was taken from the tumor and frozen in liquid nitrogen	total RNA	Total RNA was extracted from snap-frozen tumours using the Qiamp total RNA kit - PN 74104 -QIAGEN, Hilden, Germany after histological control.	Cy3	cRNA were amplified from 350 ng of total RNA were amplified and fluorescent cDNA were synthesis from cRNA using the kit Agilent Low RNA Input Fluorescent Linear Amplification Kit - PN 5184-3523 - Agilent Technologies	9606	Total RNA from pooled tumor RNA samples	Homo sapiens	sample type: Total RNA from pooled tumor RNA samples	tissue: Clear-cell renal cell carcinoma	Immediately after nephrectomy, a sample was taken from the tumor and frozen in liquid nitrogen	total RNA	Total RNA was extracted from snap-frozen tumours using the Qiamp total RNA kit - PN 74104 -QIAGEN, Hilden, Germany after histological control.	Cy5	cRNA were amplified from 350 ng of total RNA were amplified and fluorescent cDNA were synthesis from cRNA using the kit Agilent Low RNA Input Fluorescent Linear Amplification Kit - PN 5184-3523 - Agilent Technologies	9606	750 ng of the two cDNA labelled Cyanine 3 and Cyanine 5 were hybridizated using the kit In-Situ Hybridization Kit Plus - PN 5184-3568 - Agilent Technologies	Agilent Technologies Scanner G2505B US22502565 Agilent Technologies Scanner G2505B US22502565	Images were quantified using Agilent Feature Extraction Software (version A.8.5.1.1).	Agilent Feature Extraction Software (v 8.5.1.1) was used for background subtraction and LOWESS normalization.	GPL1708	Julien,,Edeline	j.edeline@rennes.fnclcc.fr	UMR 6061	CNRS-Universit茅 Rennes1
GSM733586	Public on May 28 2011	May 27 2011	Jun 26 2011	RNA	2	Clear-cell renal cell carcinoma CH G	Homo sapiens	age at diagnosis (y): 61	t (tnm stage): 1	n (tnm stage): 0	m (tnm stage): 1	fuhrman grade: 3	renal vein involvement: 0	peri-nephric fat involvement: 0	sarcomatoid component: 1	tumor necrosis: 1	microvascular invasion: 0	microvascular density (mvd): 31	progression (1=yes, 0=no): 1	death (1=yes, 0=no): 1	death from cancer (1=yes, 0=no): 1	survival time: 11	tissue: Clear-cell renal cell carcinoma		Immediately after nephrectomy, a sample was taken from the tumor and frozen in liquid nitrogen	total RNA	Total RNA was extracted from snap-frozen tumours using the Qiamp total RNA kit - PN 74104 -QIAGEN, Hilden, Germany after histological control.	Cy3	cRNA were amplified from 350 ng of total RNA were amplified and fluorescent cDNA were synthesis from cRNA using the kit Agilent Low RNA Input Fluorescent Linear Amplification Kit - PN 5184-3523 - Agilent Technologies	9606	Total RNA from pooled tumor RNA samples	Homo sapiens	sample type: Total RNA from pooled tumor RNA samples	tissue: Clear-cell renal cell carcinoma	Immediately after nephrectomy, a sample was taken from the tumor and frozen in liquid nitrogen	total RNA	Total RNA was extracted from snap-frozen tumours using the Qiamp total RNA kit - PN 74104 -QIAGEN, Hilden, Germany after histological control.	Cy5	cRNA were amplified from 350 ng of total RNA were amplified and fluorescent cDNA were synthesis from cRNA using the kit Agilent Low RNA Input Fluorescent Linear Amplification Kit - PN 5184-3523 - Agilent Technologies	9606	750 ng of the two cDNA labelled Cyanine 3 and Cyanine 5 were hybridizated using the kit In-Situ Hybridization Kit Plus - PN 5184-3568 - Agilent Technologies	Agilent Technologies Scanner G2505B US22502565 Agilent Technologies Scanner G2505B US22502565	Images were quantified using Agilent Feature Extraction Software (version A.8.5.1.1).	Agilent Feature Extraction Software (v 8.5.1.1) was used for background subtraction and LOWESS normalization.	GPL1708	Julien,,Edeline	j.edeline@rennes.fnclcc.fr	UMR 6061	CNRS-Universit茅 Rennes1
GSM733587	Public on May 28 2011	May 27 2011	Jun 26 2011	RNA	2	Clear-cell renal cell carcinoma CO A	Homo sapiens	age at diagnosis (y): 74	t (tnm stage): 1	n (tnm stage): 0	m (tnm stage): 0	fuhrman grade: 2	renal vein involvement: 0	inferior vena cava involvement: 0	peri-nephric fat involvement: 0	sarcomatoid component: 0	tumor necrosis: 0	microvascular invasion: 0	progression (1=yes, 0=no): 0	death (1=yes, 0=no): 0	death from cancer (1=yes, 0=no): 0	survival time: 38	tissue: Clear-cell renal cell carcinoma		Immediately after nephrectomy, a sample was taken from the tumor and frozen in liquid nitrogen	total RNA	Total RNA was extracted from snap-frozen tumours using the Qiamp total RNA kit - PN 74104 -QIAGEN, Hilden, Germany after histological control.	Cy3	cRNA were amplified from 350 ng of total RNA were amplified and fluorescent cDNA were synthesis from cRNA using the kit Agilent Low RNA Input Fluorescent Linear Amplification Kit - PN 5184-3523 - Agilent Technologies	9606	Total RNA from pooled tumor RNA samples	Homo sapiens	sample type: Total RNA from pooled tumor RNA samples	tissue: Clear-cell renal cell carcinoma	Immediately after nephrectomy, a sample was taken from the tumor and frozen in liquid nitrogen	total RNA	Total RNA was extracted from snap-frozen tumours using the Qiamp total RNA kit - PN 74104 -QIAGEN, Hilden, Germany after histological control.	Cy5	cRNA were amplified from 350 ng of total RNA were amplified and fluorescent cDNA were synthesis from cRNA using the kit Agilent Low RNA Input Fluorescent Linear Amplification Kit - PN 5184-3523 - Agilent Technologies	9606	750 ng of the two cDNA labelled Cyanine 3 and Cyanine 5 were hybridizated using the kit In-Situ Hybridization Kit Plus - PN 5184-3568 - Agilent Technologies	Agilent Technologies Scanner G2505B US22502565 Agilent Technologies Scanner G2505B US22502565	Images were quantified using Agilent Feature Extraction Software (version A.8.5.1.1).	Agilent Feature Extraction Software (v 8.5.1.1) was used for background subtraction and LOWESS normalization.	GPL1708	Julien,,Edeline	j.edeline@rennes.fnclcc.fr	UMR 6061	CNRS-Universit茅 Rennes1
GSM733588	Public on May 28 2011	May 27 2011	Jun 26 2011	RNA	2	Clear-cell renal cell carcinoma DE G	Homo sapiens	age at diagnosis (y): 68	t (tnm stage): 1	n (tnm stage): 0	m (tnm stage): 0	fuhrman grade: 2	renal vein involvement: 0	inferior vena cava involvement: 0	peri-nephric fat involvement: 0	sarcomatoid component: 0	tumor necrosis: 0	microvascular invasion: 0	microvascular density (mvd): 82	progression (1=yes, 0=no): 0	death (1=yes, 0=no): 0	death from cancer (1=yes, 0=no): 0	survival time: 47	tissue: Clear-cell renal cell carcinoma	Immediately after nephrectomy, a sample was taken from the tumor and frozen in liquid nitrogen	total RNA	Total RNA was extracted from snap-frozen tumours using the Qiamp total RNA kit - PN 74104 -QIAGEN, Hilden, Germany after histological control.	Cy3	cRNA were amplified from 350 ng of total RNA were amplified and fluorescent cDNA were synthesis from cRNA using the kit Agilent Low RNA Input Fluorescent Linear Amplification Kit - PN 5184-3523 - Agilent Technologies	9606	Total RNA from pooled tumor RNA samples	Homo sapiens	sample type: Total RNA from pooled tumor RNA samples	tissue: Clear-cell renal cell carcinoma	Immediately after nephrectomy, a sample was taken from the tumor and frozen in liquid nitrogen	total RNA	Total RNA was extracted from snap-frozen tumours using the Qiamp total RNA kit - PN 74104 -QIAGEN, Hilden, Germany after histological control.	Cy5	cRNA were amplified from 350 ng of total RNA were amplified and fluorescent cDNA were synthesis from cRNA using the kit Agilent Low RNA Input Fluorescent Linear Amplification Kit - PN 5184-3523 - Agilent Technologies	9606	750 ng of the two cDNA labelled Cyanine 3 and Cyanine 5 were hybridizated using the kit In-Situ Hybridization Kit Plus - PN 5184-3568 - Agilent Technologies	Agilent Technologies Scanner G2505B US22502565 Agilent Technologies Scanner G2505B US22502565	Images were quantified using Agilent Feature Extraction Software (version A.8.5.1.1).	Agilent Feature Extraction Software (v 8.5.1.1) was used for background subtraction and LOWESS normalization.	GPL1708	Julien,,Edeline	j.edeline@rennes.fnclcc.fr	UMR 6061	CNRS-Universit茅 Rennes1
GSM733589	Public on May 28 2011	May 27 2011	Jun 26 2011	RNA	2	Clear-cell renal cell carcinoma DE R	Homo sapiens	age at diagnosis (y): 69	t (tnm stage): 3	n (tnm stage): 0	m (tnm stage): 1	fuhrman grade: 4	renal vein involvement: 1	inferior vena cava involvement: 0	peri-nephric fat involvement: 0	sarcomatoid component: 1	tumor necrosis: 1	microvascular invasion: 1	microvascular density (mvd): 30	progression (1=yes, 0=no): 0	death (1=yes, 0=no): 0	death from cancer (1=yes, 0=no): 0	survival time: 31	tissue: Clear-cell renal cell carcinoma	Immediately after nephrectomy, a sample was taken from the tumor and frozen in liquid nitrogen	total RNA	Total RNA was extracted from snap-frozen tumours using the Qiamp total RNA kit - PN 74104 -QIAGEN, Hilden, Germany after histological control.	Cy3	cRNA were amplified from 350 ng of total RNA were amplified and fluorescent cDNA were synthesis from cRNA using the kit Agilent Low RNA Input Fluorescent Linear Amplification Kit - PN 5184-3523 - Agilent Technologies	9606	Total RNA from pooled tumor RNA samples	Homo sapiens	sample type: Total RNA from pooled tumor RNA samples	tissue: Clear-cell renal cell carcinoma	Immediately after nephrectomy, a sample was taken from the tumor and frozen in liquid nitrogen	total RNA	Total RNA was extracted from snap-frozen tumours using the Qiamp total RNA kit - PN 74104 -QIAGEN, Hilden, Germany after histological control.	Cy5	cRNA were amplified from 350 ng of total RNA were amplified and fluorescent cDNA were synthesis from cRNA using the kit Agilent Low RNA Input Fluorescent Linear Amplification Kit - PN 5184-3523 - Agilent Technologies	9606	750 ng of the two cDNA labelled Cyanine 3 and Cyanine 5 were hybridizated using the kit In-Situ Hybridization Kit Plus - PN 5184-3568 - Agilent Technologies	Agilent Technologies Scanner G2505B US22502565 Agilent Technologies Scanner G2505B US22502565	Images were quantified using Agilent Feature Extraction Software (version A.8.5.1.1).	Agilent Feature Extraction Software (v 8.5.1.1) was used for background subtraction and LOWESS normalization.	GPL1708	Julien,,Edeline	j.edeline@rennes.fnclcc.fr	UMR 6061	CNRS-Universit茅 Rennes1
GSM733590	Public on May 28 2011	May 27 2011	Jun 26 2011	RNA	2	Clear-cell renal cell carcinoma DU B	Homo sapiens	age at diagnosis (y): 55	t (tnm stage): 1	n (tnm stage): 0	m (tnm stage): 0	fuhrman grade: 2	renal vein involvement: 0	inferior vena cava involvement: 0	peri-nephric fat involvement: 0	sarcomatoid component: 0	tumor necrosis: 0	microvascular invasion: 0	microvascular density (mvd): 86	progression (1=yes, 0=no): 0	death (1=yes, 0=no): 0	death from cancer (1=yes, 0=no): 0	survival time: 43	tissue: Clear-cell renal cell carcinoma	Immediately after nephrectomy, a sample was taken from the tumor and frozen in liquid nitrogen	total RNA	Total RNA was extracted from snap-frozen tumours using the Qiamp total RNA kit - PN 74104 -QIAGEN, Hilden, Germany after histological control.	Cy3	cRNA were amplified from 350 ng of total RNA were amplified and fluorescent cDNA were synthesis from cRNA using the kit Agilent Low RNA Input Fluorescent Linear Amplification Kit - PN 5184-3523 - Agilent Technologies	9606	Total RNA from pooled tumor RNA samples	Homo sapiens	sample type: Total RNA from pooled tumor RNA samples	tissue: Clear-cell renal cell carcinoma	Immediately after nephrectomy, a sample was taken from the tumor and frozen in liquid nitrogen	total RNA	Total RNA was extracted from snap-frozen tumours using the Qiamp total RNA kit - PN 74104 -QIAGEN, Hilden, Germany after histological control.	Cy5	cRNA were amplified from 350 ng of total RNA were amplified and fluorescent cDNA were synthesis from cRNA using the kit Agilent Low RNA Input Fluorescent Linear Amplification Kit - PN 5184-3523 - Agilent Technologies	9606	750 ng of the two cDNA labelled Cyanine 3 and Cyanine 5 were hybridizated using the kit In-Situ Hybridization Kit Plus - PN 5184-3568 - Agilent Technologies	Agilent Technologies Scanner G2505B US22502565 Agilent Technologies Scanner G2505B US22502565	Images were quantified using Agilent Feature Extraction Software (version A.8.5.1.1).	Agilent Feature Extraction Software (v 8.5.1.1) was used for background subtraction and LOWESS normalization.	GPL1708	Julien,,Edeline	j.edeline@rennes.fnclcc.fr	UMR 6061	CNRS-Universit茅 Rennes1
GSM733591	Public on May 28 2011	May 27 2011	Jun 26 2011	RNA	2	Clear-cell renal cell carcinoma EM M	Homo sapiens	age at diagnosis (y): 72	t (tnm stage): 1	n (tnm stage): 0	m (tnm stage): 0	fuhrman grade: 2	renal vein involvement: 0	inferior vena cava involvement: 0	peri-nephric fat involvement: 0	sarcomatoid component: 0	tumor necrosis: 0	microvascular invasion: 0	microvascular density (mvd): 42	progression (1=yes, 0=no): 0	death (1=yes, 0=no): 0	death from cancer (1=yes, 0=no): 0	survival time: 62	tissue: Clear-cell renal cell carcinoma	Immediately after nephrectomy, a sample was taken from the tumor and frozen in liquid nitrogen	total RNA	Total RNA was extracted from snap-frozen tumours using the Qiamp total RNA kit - PN 74104 -QIAGEN, Hilden, Germany after histological control.	Cy3	cRNA were amplified from 350 ng of total RNA were amplified and fluorescent cDNA were synthesis from cRNA using the kit Agilent Low RNA Input Fluorescent Linear Amplification Kit - PN 5184-3523 - Agilent Technologies	9606	Total RNA from pooled tumor RNA samples	Homo sapiens	sample type: Total RNA from pooled tumor RNA samples	tissue: Clear-cell renal cell carcinoma	Immediately after nephrectomy, a sample was taken from the tumor and frozen in liquid nitrogen	total RNA	Total RNA was extracted from snap-frozen tumours using the Qiamp total RNA kit - PN 74104 -QIAGEN, Hilden, Germany after histological control.	Cy5	cRNA were amplified from 350 ng of total RNA were amplified and fluorescent cDNA were synthesis from cRNA using the kit Agilent Low RNA Input Fluorescent Linear Amplification Kit - PN 5184-3523 - Agilent Technologies	9606	750 ng of the two cDNA labelled Cyanine 3 and Cyanine 5 were hybridizated using the kit In-Situ Hybridization Kit Plus - PN 5184-3568 - Agilent Technologies	Agilent Technologies Scanner G2505B US22502565 Agilent Technologies Scanner G2505B US22502565	Images were quantified using Agilent Feature Extraction Software (version A.8.5.1.1).	Agilent Feature Extraction Software (v 8.5.1.1) was used for background subtraction and LOWESS normalization.	GPL1708	Julien,,Edeline	j.edeline@rennes.fnclcc.fr	UMR 6061	CNRS-Universit茅 Rennes1
GSM733592	Public on May 28 2011	May 27 2011	Jun 26 2011	RNA	2	Clear-cell renal cell carcinoma GI F	Homo sapiens	age at diagnosis (y): 53	t (tnm stage): 1	n (tnm stage): 0	m (tnm stage): 0	fuhrman grade: 4	renal vein involvement: 0	inferior vena cava involvement: 0	peri-nephric fat involvement: 0	sarcomatoid component: 0	tumor necrosis: 1	microvascular invasion: 1	progression (1=yes, 0=no): 0	death (1=yes, 0=no): 0	death from cancer (1=yes, 0=no): 0	survival time: 46	tissue: Clear-cell renal cell carcinoma		Immediately after nephrectomy, a sample was taken from the tumor and frozen in liquid nitrogen	total RNA	Total RNA was extracted from snap-frozen tumours using the Qiamp total RNA kit - PN 74104 -QIAGEN, Hilden, Germany after histological control.	Cy3	cRNA were amplified from 350 ng of total RNA were amplified and fluorescent cDNA were synthesis from cRNA using the kit Agilent Low RNA Input Fluorescent Linear Amplification Kit - PN 5184-3523 - Agilent Technologies	9606	Total RNA from pooled tumor RNA samples	Homo sapiens	sample type: Total RNA from pooled tumor RNA samples	tissue: Clear-cell renal cell carcinoma	Immediately after nephrectomy, a sample was taken from the tumor and frozen in liquid nitrogen	total RNA	Total RNA was extracted from snap-frozen tumours using the Qiamp total RNA kit - PN 74104 -QIAGEN, Hilden, Germany after histological control.	Cy5	cRNA were amplified from 350 ng of total RNA were amplified and fluorescent cDNA were synthesis from cRNA using the kit Agilent Low RNA Input Fluorescent Linear Amplification Kit - PN 5184-3523 - Agilent Technologies	9606	750 ng of the two cDNA labelled Cyanine 3 and Cyanine 5 were hybridizated using the kit In-Situ Hybridization Kit Plus - PN 5184-3568 - Agilent Technologies	Agilent Technologies Scanner G2505B US22502565 Agilent Technologies Scanner G2505B US22502565	Images were quantified using Agilent Feature Extraction Software (version A.8.5.1.1).	Agilent Feature Extraction Software (v 8.5.1.1) was used for background subtraction and LOWESS normalization.	GPL1708	Julien,,Edeline	j.edeline@rennes.fnclcc.fr	UMR 6061	CNRS-Universit茅 Rennes1
GSM733593	Public on May 28 2011	May 27 2011	Jun 26 2011	RNA	2	Clear-cell renal cell carcinoma GO C	Homo sapiens	age at diagnosis (y): 40	t (tnm stage): 1	n (tnm stage): 0	m (tnm stage): 0	fuhrman grade: 2	renal vein involvement: 0	inferior vena cava involvement: 0	peri-nephric fat involvement: 0	sarcomatoid component: 0	tumor necrosis: 1	microvascular invasion: 0	microvascular density (mvd): 68	progression (1=yes, 0=no): 0	death (1=yes, 0=no): 0	death from cancer (1=yes, 0=no): 0	survival time: 44	tissue: Clear-cell renal cell carcinoma	Immediately after nephrectomy, a sample was taken from the tumor and frozen in liquid nitrogen	total RNA	Total RNA was extracted from snap-frozen tumours using the Qiamp total RNA kit - PN 74104 -QIAGEN, Hilden, Germany after histological control.	Cy3	cRNA were amplified from 350 ng of total RNA were amplified and fluorescent cDNA were synthesis from cRNA using the kit Agilent Low RNA Input Fluorescent Linear Amplification Kit - PN 5184-3523 - Agilent Technologies	9606	Total RNA from pooled tumor RNA samples	Homo sapiens	sample type: Total RNA from pooled tumor RNA samples	tissue: Clear-cell renal cell carcinoma	Immediately after nephrectomy, a sample was taken from the tumor and frozen in liquid nitrogen	total RNA	Total RNA was extracted from snap-frozen tumours using the Qiamp total RNA kit - PN 74104 -QIAGEN, Hilden, Germany after histological control.	Cy5	cRNA were amplified from 350 ng of total RNA were amplified and fluorescent cDNA were synthesis from cRNA using the kit Agilent Low RNA Input Fluorescent Linear Amplification Kit - PN 5184-3523 - Agilent Technologies	9606	750 ng of the two cDNA labelled Cyanine 3 and Cyanine 5 were hybridizated using the kit In-Situ Hybridization Kit Plus - PN 5184-3568 - Agilent Technologies	Agilent Technologies Scanner G2505B US22502565 Agilent Technologies Scanner G2505B US22502565	Images were quantified using Agilent Feature Extraction Software (version A.8.5.1.1).	Agilent Feature Extraction Software (v 8.5.1.1) was used for background subtraction and LOWESS normalization.	GPL1708	Julien,,Edeline	j.edeline@rennes.fnclcc.fr	UMR 6061	CNRS-Universit茅 Rennes1
GSM733594	Public on May 28 2011	May 27 2011	Jun 26 2011	RNA	2	Clear-cell renal cell carcinoma GU N	Homo sapiens	age at diagnosis (y): 60	t (tnm stage): 3	n (tnm stage): 0	m (tnm stage): 1	fuhrman grade: 4	renal vein involvement: 1	inferior vena cava involvement: 0	peri-nephric fat involvement: 1	sarcomatoid component: 1	tumor necrosis: 0	microvascular invasion: 1	microvascular density (mvd): 32	progression (1=yes, 0=no): 1	death (1=yes, 0=no): 0	death from cancer (1=yes, 0=no): 0	survival time: 39	tissue: Clear-cell renal cell carcinoma	Immediately after nephrectomy, a sample was taken from the tumor and frozen in liquid nitrogen	total RNA	Total RNA was extracted from snap-frozen tumours using the Qiamp total RNA kit - PN 74104 -QIAGEN, Hilden, Germany after histological control.	Cy3	cRNA were amplified from 350 ng of total RNA were amplified and fluorescent cDNA were synthesis from cRNA using the kit Agilent Low RNA Input Fluorescent Linear Amplification Kit - PN 5184-3523 - Agilent Technologies	9606	Total RNA from pooled tumor RNA samples	Homo sapiens	sample type: Total RNA from pooled tumor RNA samples	tissue: Clear-cell renal cell carcinoma	Immediately after nephrectomy, a sample was taken from the tumor and frozen in liquid nitrogen	total RNA	Total RNA was extracted from snap-frozen tumours using the Qiamp total RNA kit - PN 74104 -QIAGEN, Hilden, Germany after histological control.	Cy5	cRNA were amplified from 350 ng of total RNA were amplified and fluorescent cDNA were synthesis from cRNA using the kit Agilent Low RNA Input Fluorescent Linear Amplification Kit - PN 5184-3523 - Agilent Technologies	9606	750 ng of the two cDNA labelled Cyanine 3 and Cyanine 5 were hybridizated using the kit In-Situ Hybridization Kit Plus - PN 5184-3568 - Agilent Technologies	Agilent Technologies Scanner G2505B US22502565 Agilent Technologies Scanner G2505B US22502565	Images were quantified using Agilent Feature Extraction Software (version A.8.5.1.1).	Agilent Feature Extraction Software (v 8.5.1.1) was used for background subtraction and LOWESS normalization.	GPL1708	Julien,,Edeline	j.edeline@rennes.fnclcc.fr	UMR 6061	CNRS-Universit茅 Rennes1
GSM733595	Public on May 28 2011	May 27 2011	Jun 26 2011	RNA	2	Clear-cell renal cell carcinoma GU R	Homo sapiens	age at diagnosis (y): 68	t (tnm stage): 3	n (tnm stage): 0	m (tnm stage): 1	fuhrman grade: 4	renal vein involvement: 1	inferior vena cava involvement: 0	peri-nephric fat involvement: 0	sarcomatoid component: 1	tumor necrosis: 1	microvascular invasion: 1	microvascular density (mvd): 34	progression (1=yes, 0=no): 1	death (1=yes, 0=no): 1	death from cancer (1=yes, 0=no): 1	survival time: 7	tissue: Clear-cell renal cell carcinoma	Immediately after nephrectomy, a sample was taken from the tumor and frozen in liquid nitrogen	total RNA	Total RNA was extracted from snap-frozen tumours using the Qiamp total RNA kit - PN 74104 -QIAGEN, Hilden, Germany after histological control.	Cy3	cRNA were amplified from 350 ng of total RNA were amplified and fluorescent cDNA were synthesis from cRNA using the kit Agilent Low RNA Input Fluorescent Linear Amplification Kit - PN 5184-3523 - Agilent Technologies	9606	Total RNA from pooled tumor RNA samples	Homo sapiens	sample type: Total RNA from pooled tumor RNA samples	tissue: Clear-cell renal cell carcinoma	Immediately after nephrectomy, a sample was taken from the tumor and frozen in liquid nitrogen	total RNA	Total RNA was extracted from snap-frozen tumours using the Qiamp total RNA kit - PN 74104 -QIAGEN, Hilden, Germany after histological control.	Cy5	cRNA were amplified from 350 ng of total RNA were amplified and fluorescent cDNA were synthesis from cRNA using the kit Agilent Low RNA Input Fluorescent Linear Amplification Kit - PN 5184-3523 - Agilent Technologies	9606	750 ng of the two cDNA labelled Cyanine 3 and Cyanine 5 were hybridizated using the kit In-Situ Hybridization Kit Plus - PN 5184-3568 - Agilent Technologies	Agilent Technologies Scanner G2505B US22502565 Agilent Technologies Scanner G2505B US22502565	Images were quantified using Agilent Feature Extraction Software (version A.8.5.1.1).	Agilent Feature Extraction Software (v 8.5.1.1) was used for background subtraction and LOWESS normalization.	GPL1708	Julien,,Edeline	j.edeline@rennes.fnclcc.fr	UMR 6061	CNRS-Universit茅 Rennes1
GSM733596	Public on May 28 2011	May 27 2011	Jun 26 2011	RNA	2	Clear-cell renal cell carcinoma HE L	Homo sapiens	age at diagnosis (y): 70	t (tnm stage): 3	n (tnm stage): 0	m (tnm stage): 0	fuhrman grade: 2	renal vein involvement: 1	inferior vena cava involvement: 1	peri-nephric fat involvement: 0	sarcomatoid component: 0	tumor necrosis: 1	microvascular invasion: 1	microvascular density (mvd): 59	progression (1=yes, 0=no): 1	death (1=yes, 0=no): 1	death from cancer (1=yes, 0=no): 1	survival time: 54	tissue: Clear-cell renal cell carcinoma	Immediately after nephrectomy, a sample was taken from the tumor and frozen in liquid nitrogen	total RNA	Total RNA was extracted from snap-frozen tumours using the Qiamp total RNA kit - PN 74104 -QIAGEN, Hilden, Germany after histological control.	Cy3	cRNA were amplified from 350 ng of total RNA were amplified and fluorescent cDNA were synthesis from cRNA using the kit Agilent Low RNA Input Fluorescent Linear Amplification Kit - PN 5184-3523 - Agilent Technologies	9606	Total RNA from pooled tumor RNA samples	Homo sapiens	sample type: Total RNA from pooled tumor RNA samples	tissue: Clear-cell renal cell carcinoma	Immediately after nephrectomy, a sample was taken from the tumor and frozen in liquid nitrogen	total RNA	Total RNA was extracted from snap-frozen tumours using the Qiamp total RNA kit - PN 74104 -QIAGEN, Hilden, Germany after histological control.	Cy5	cRNA were amplified from 350 ng of total RNA were amplified and fluorescent cDNA were synthesis from cRNA using the kit Agilent Low RNA Input Fluorescent Linear Amplification Kit - PN 5184-3523 - Agilent Technologies	9606	750 ng of the two cDNA labelled Cyanine 3 and Cyanine 5 were hybridizated using the kit In-Situ Hybridization Kit Plus - PN 5184-3568 - Agilent Technologies	Agilent Technologies Scanner G2505B US22502565 Agilent Technologies Scanner G2505B US22502565	Images were quantified using Agilent Feature Extraction Software (version A.8.5.1.1).	Agilent Feature Extraction Software (v 8.5.1.1) was used for background subtraction and LOWESS normalization.	GPL1708	Julien,,Edeline	j.edeline@rennes.fnclcc.fr	UMR 6061	CNRS-Universit茅 Rennes1
GSM733597	Public on May 28 2011	May 27 2011	Jun 26 2011	RNA	2	Clear-cell renal cell carcinoma JA J	Homo sapiens	age at diagnosis (y): 68	t (tnm stage): 3	n (tnm stage): 0	m (tnm stage): 0	fuhrman grade: 3	renal vein involvement: 1	inferior vena cava involvement: 1	peri-nephric fat involvement: 1	sarcomatoid component: 0	tumor necrosis: 1	microvascular invasion: 1	microvascular density (mvd): 13	progression (1=yes, 0=no): 1	death (1=yes, 0=no): 0	death from cancer (1=yes, 0=no): 0	survival time: 68	tissue: Clear-cell renal cell carcinoma	Immediately after nephrectomy, a sample was taken from the tumor and frozen in liquid nitrogen	total RNA	Total RNA was extracted from snap-frozen tumours using the Qiamp total RNA kit - PN 74104 -QIAGEN, Hilden, Germany after histological control.	Cy3	cRNA were amplified from 350 ng of total RNA were amplified and fluorescent cDNA were synthesis from cRNA using the kit Agilent Low RNA Input Fluorescent Linear Amplification Kit - PN 5184-3523 - Agilent Technologies	9606	Total RNA from pooled tumor RNA samples	Homo sapiens	sample type: Total RNA from pooled tumor RNA samples	tissue: Clear-cell renal cell carcinoma	Immediately after nephrectomy, a sample was taken from the tumor and frozen in liquid nitrogen	total RNA	Total RNA was extracted from snap-frozen tumours using the Qiamp total RNA kit - PN 74104 -QIAGEN, Hilden, Germany after histological control.	Cy5	cRNA were amplified from 350 ng of total RNA were amplified and fluorescent cDNA were synthesis from cRNA using the kit Agilent Low RNA Input Fluorescent Linear Amplification Kit - PN 5184-3523 - Agilent Technologies	9606	750 ng of the two cDNA labelled Cyanine 3 and Cyanine 5 were hybridizated using the kit In-Situ Hybridization Kit Plus - PN 5184-3568 - Agilent Technologies	Agilent Technologies Scanner G2505B US22502565 Agilent Technologies Scanner G2505B US22502565	Images were quantified using Agilent Feature Extraction Software (version A.8.5.1.1).	Agilent Feature Extraction Software (v 8.5.1.1) was used for background subtraction and LOWESS normalization.	GPL1708	Julien,,Edeline	j.edeline@rennes.fnclcc.fr	UMR 6061	CNRS-Universit茅 Rennes1
GSM733598	Public on May 28 2011	May 27 2011	Jun 26 2011	RNA	2	Clear-cell renal cell carcinoma JA E	Homo sapiens	age at diagnosis (y): 55	t (tnm stage): 3	n (tnm stage): 0	m (tnm stage): 0	fuhrman grade: 3	renal vein involvement: 0	inferior vena cava involvement: 0	peri-nephric fat involvement: 1	sarcomatoid component: 0	tumor necrosis: 1	microvascular invasion: 1	microvascular density (mvd): 56	progression (1=yes, 0=no): 1	death (1=yes, 0=no): 1	death from cancer (1=yes, 0=no): 1	survival time: 10	tissue: Clear-cell renal cell carcinoma	Immediately after nephrectomy, a sample was taken from the tumor and frozen in liquid nitrogen	total RNA	Total RNA was extracted from snap-frozen tumours using the Qiamp total RNA kit - PN 74104 -QIAGEN, Hilden, Germany after histological control.	Cy3	cRNA were amplified from 350 ng of total RNA were amplified and fluorescent cDNA were synthesis from cRNA using the kit Agilent Low RNA Input Fluorescent Linear Amplification Kit - PN 5184-3523 - Agilent Technologies	9606	Total RNA from pooled tumor RNA samples	Homo sapiens	sample type: Total RNA from pooled tumor RNA samples	tissue: Clear-cell renal cell carcinoma	Immediately after nephrectomy, a sample was taken from the tumor and frozen in liquid nitrogen	total RNA	Total RNA was extracted from snap-frozen tumours using the Qiamp total RNA kit - PN 74104 -QIAGEN, Hilden, Germany after histological control.	Cy5	cRNA were amplified from 350 ng of total RNA were amplified and fluorescent cDNA were synthesis from cRNA using the kit Agilent Low RNA Input Fluorescent Linear Amplification Kit - PN 5184-3523 - Agilent Technologies	9606	750 ng of the two cDNA labelled Cyanine 3 and Cyanine 5 were hybridizated using the kit In-Situ Hybridization Kit Plus - PN 5184-3568 - Agilent Technologies	Agilent Technologies Scanner G2505B US22502565 Agilent Technologies Scanner G2505B US22502565	Images were quantified using Agilent Feature Extraction Software (version A.8.5.1.1).	Agilent Feature Extraction Software (v 8.5.1.1) was used for background subtraction and LOWESS normalization.	GPL1708	Julien,,Edeline	j.edeline@rennes.fnclcc.fr	UMR 6061	CNRS-Universit茅 Rennes1
GSM733599	Public on May 28 2011	May 27 2011	Jun 26 2011	RNA	2	Clear-cell renal cell carcinoma LE A	Homo sapiens	age at diagnosis (y): 64	t (tnm stage): 3	n (tnm stage): 0	m (tnm stage): 1	fuhrman grade: 4	renal vein involvement: 1	inferior vena cava involvement: 1	peri-nephric fat involvement: 1	sarcomatoid component: 1	tumor necrosis: 1	microvascular invasion: 1	microvascular density (mvd): 69	progression (1=yes, 0=no): 1	death (1=yes, 0=no): 1	death from cancer (1=yes, 0=no): 1	survival time: 6	tissue: Clear-cell renal cell carcinoma	Immediately after nephrectomy, a sample was taken from the tumor and frozen in liquid nitrogen	total RNA	Total RNA was extracted from snap-frozen tumours using the Qiamp total RNA kit - PN 74104 -QIAGEN, Hilden, Germany after histological control.	Cy3	cRNA were amplified from 350 ng of total RNA were amplified and fluorescent cDNA were synthesis from cRNA using the kit Agilent Low RNA Input Fluorescent Linear Amplification Kit - PN 5184-3523 - Agilent Technologies	9606	Total RNA from pooled tumor RNA samples	Homo sapiens	sample type: Total RNA from pooled tumor RNA samples	tissue: Clear-cell renal cell carcinoma	Immediately after nephrectomy, a sample was taken from the tumor and frozen in liquid nitrogen	total RNA	Total RNA was extracted from snap-frozen tumours using the Qiamp total RNA kit - PN 74104 -QIAGEN, Hilden, Germany after histological control.	Cy5	cRNA were amplified from 350 ng of total RNA were amplified and fluorescent cDNA were synthesis from cRNA using the kit Agilent Low RNA Input Fluorescent Linear Amplification Kit - PN 5184-3523 - Agilent Technologies	9606	750 ng of the two cDNA labelled Cyanine 3 and Cyanine 5 were hybridizated using the kit In-Situ Hybridization Kit Plus - PN 5184-3568 - Agilent Technologies	Agilent Technologies Scanner G2505B US22502565 Agilent Technologies Scanner G2505B US22502565	Images were quantified using Agilent Feature Extraction Software (version A.8.5.1.1).	Agilent Feature Extraction Software (v 8.5.1.1) was used for background subtraction and LOWESS normalization.	GPL1708	Julien,,Edeline	j.edeline@rennes.fnclcc.fr	UMR 6061	CNRS-Universit茅 Rennes1
GSM733600	Public on May 28 2011	May 27 2011	Jun 26 2011	RNA	2	Clear-cell renal cell carcinoma LE G	Homo sapiens	age at diagnosis (y): 43	t (tnm stage): 3	n (tnm stage): 1	m (tnm stage): 0	fuhrman grade: 4	renal vein involvement: 1	inferior vena cava involvement: 0	peri-nephric fat involvement: 0	sarcomatoid component: 0	tumor necrosis: 1	microvascular invasion: 1	microvascular density (mvd): 38	progression (1=yes, 0=no): 1	death (1=yes, 0=no): 1	death from cancer (1=yes, 0=no): 1	survival time: 53	tissue: Clear-cell renal cell carcinoma	Immediately after nephrectomy, a sample was taken from the tumor and frozen in liquid nitrogen	total RNA	Total RNA was extracted from snap-frozen tumours using the Qiamp total RNA kit - PN 74104 -QIAGEN, Hilden, Germany after histological control.	Cy3	cRNA were amplified from 350 ng of total RNA were amplified and fluorescent cDNA were synthesis from cRNA using the kit Agilent Low RNA Input Fluorescent Linear Amplification Kit - PN 5184-3523 - Agilent Technologies	9606	Total RNA from pooled tumor RNA samples	Homo sapiens	sample type: Total RNA from pooled tumor RNA samples	tissue: Clear-cell renal cell carcinoma	Immediately after nephrectomy, a sample was taken from the tumor and frozen in liquid nitrogen	total RNA	Total RNA was extracted from snap-frozen tumours using the Qiamp total RNA kit - PN 74104 -QIAGEN, Hilden, Germany after histological control.	Cy5	cRNA were amplified from 350 ng of total RNA were amplified and fluorescent cDNA were synthesis from cRNA using the kit Agilent Low RNA Input Fluorescent Linear Amplification Kit - PN 5184-3523 - Agilent Technologies	9606	750 ng of the two cDNA labelled Cyanine 3 and Cyanine 5 were hybridizated using the kit In-Situ Hybridization Kit Plus - PN 5184-3568 - Agilent Technologies	Agilent Technologies Scanner G2505B US22502565 Agilent Technologies Scanner G2505B US22502565	Images were quantified using Agilent Feature Extraction Software (version A.8.5.1.1).	Agilent Feature Extraction Software (v 8.5.1.1) was used for background subtraction and LOWESS normalization.	GPL1708	Julien,,Edeline	j.edeline@rennes.fnclcc.fr	UMR 6061	CNRS-Universit茅 Rennes1
GSM733601	Public on May 28 2011	May 27 2011	Jun 26 2011	RNA	2	Clear-cell renal cell carcinoma LE E	Homo sapiens	age at diagnosis (y): 72	t (tnm stage): 3	n (tnm stage): 0	m (tnm stage): 1	fuhrman grade: 3	renal vein involvement: 1	inferior vena cava involvement: 0	peri-nephric fat involvement: 0	sarcomatoid component: 0	tumor necrosis: 0	microvascular invasion: 1	microvascular density (mvd): 25	progression (1=yes, 0=no): 0	death (1=yes, 0=no): 0	death from cancer (1=yes, 0=no): 0	survival time: 53	tissue: Clear-cell renal cell carcinoma	Immediately after nephrectomy, a sample was taken from the tumor and frozen in liquid nitrogen	total RNA	Total RNA was extracted from snap-frozen tumours using the Qiamp total RNA kit - PN 74104 -QIAGEN, Hilden, Germany after histological control.	Cy3	cRNA were amplified from 350 ng of total RNA were amplified and fluorescent cDNA were synthesis from cRNA using the kit Agilent Low RNA Input Fluorescent Linear Amplification Kit - PN 5184-3523 - Agilent Technologies	9606	Total RNA from pooled tumor RNA samples	Homo sapiens	sample type: Total RNA from pooled tumor RNA samples	tissue: Clear-cell renal cell carcinoma	Immediately after nephrectomy, a sample was taken from the tumor and frozen in liquid nitrogen	total RNA	Total RNA was extracted from snap-frozen tumours using the Qiamp total RNA kit - PN 74104 -QIAGEN, Hilden, Germany after histological control.	Cy5	cRNA were amplified from 350 ng of total RNA were amplified and fluorescent cDNA were synthesis from cRNA using the kit Agilent Low RNA Input Fluorescent Linear Amplification Kit - PN 5184-3523 - Agilent Technologies	9606	750 ng of the two cDNA labelled Cyanine 3 and Cyanine 5 were hybridizated using the kit In-Situ Hybridization Kit Plus - PN 5184-3568 - Agilent Technologies	Agilent Technologies Scanner G2505B US22502565 Agilent Technologies Scanner G2505B US22502565	Images were quantified using Agilent Feature Extraction Software (version A.8.5.1.1).	Agilent Feature Extraction Software (v 8.5.1.1) was used for background subtraction and LOWESS normalization.	GPL1708	Julien,,Edeline	j.edeline@rennes.fnclcc.fr	UMR 6061	CNRS-Universit茅 Rennes1
GSM733602	Public on May 28 2011	May 27 2011	Jun 26 2011	RNA	2	Clear-cell renal cell carcinoma LE S	Homo sapiens	age at diagnosis (y): 73	t (tnm stage): 2	n (tnm stage): 0	m (tnm stage): 1	fuhrman grade: 2	renal vein involvement: 0	inferior vena cava involvement: 0	peri-nephric fat involvement: 0	sarcomatoid component: 0	tumor necrosis: 0	microvascular invasion: 1	microvascular density (mvd): 59	progression (1=yes, 0=no): 0	death (1=yes, 0=no): 0	death from cancer (1=yes, 0=no): 0	survival time: 29	tissue: Clear-cell renal cell carcinoma	Immediately after nephrectomy, a sample was taken from the tumor and frozen in liquid nitrogen	total RNA	Total RNA was extracted from snap-frozen tumours using the Qiamp total RNA kit - PN 74104 -QIAGEN, Hilden, Germany after histological control.	Cy3	cRNA were amplified from 350 ng of total RNA were amplified and fluorescent cDNA were synthesis from cRNA using the kit Agilent Low RNA Input Fluorescent Linear Amplification Kit - PN 5184-3523 - Agilent Technologies	9606	Total RNA from pooled tumor RNA samples	Homo sapiens	sample type: Total RNA from pooled tumor RNA samples	tissue: Clear-cell renal cell carcinoma	Immediately after nephrectomy, a sample was taken from the tumor and frozen in liquid nitrogen	total RNA	Total RNA was extracted from snap-frozen tumours using the Qiamp total RNA kit - PN 74104 -QIAGEN, Hilden, Germany after histological control.	Cy5	cRNA were amplified from 350 ng of total RNA were amplified and fluorescent cDNA were synthesis from cRNA using the kit Agilent Low RNA Input Fluorescent Linear Amplification Kit - PN 5184-3523 - Agilent Technologies	9606	750 ng of the two cDNA labelled Cyanine 3 and Cyanine 5 were hybridizated using the kit In-Situ Hybridization Kit Plus - PN 5184-3568 - Agilent Technologies	Agilent Technologies Scanner G2505B US22502565 Agilent Technologies Scanner G2505B US22502565	Images were quantified using Agilent Feature Extraction Software (version A.8.5.1.1).	Agilent Feature Extraction Software (v 8.5.1.1) was used for background subtraction and LOWESS normalization.	GPL1708	Julien,,Edeline	j.edeline@rennes.fnclcc.fr	UMR 6061	CNRS-Universit茅 Rennes1
GSM733603	Public on May 28 2011	May 27 2011	Jun 26 2011	RNA	2	Clear-cell renal cell carcinoma LE J	Homo sapiens	age at diagnosis (y): 50	t (tnm stage): 3	n (tnm stage): 0	m (tnm stage): 1	fuhrman grade: 3	renal vein involvement: 1	inferior vena cava involvement: 0	peri-nephric fat involvement: 0	sarcomatoid component: 0	tumor necrosis: 0	microvascular invasion: 1	microvascular density (mvd): 38	progression (1=yes, 0=no): 0	death (1=yes, 0=no): 0	death from cancer (1=yes, 0=no): 0	survival time: 56	tissue: Clear-cell renal cell carcinoma	Immediately after nephrectomy, a sample was taken from the tumor and frozen in liquid nitrogen	total RNA	Total RNA was extracted from snap-frozen tumours using the Qiamp total RNA kit - PN 74104 -QIAGEN, Hilden, Germany after histological control.	Cy3	cRNA were amplified from 350 ng of total RNA were amplified and fluorescent cDNA were synthesis from cRNA using the kit Agilent Low RNA Input Fluorescent Linear Amplification Kit - PN 5184-3523 - Agilent Technologies	9606	Total RNA from pooled tumor RNA samples	Homo sapiens	sample type: Total RNA from pooled tumor RNA samples	tissue: Clear-cell renal cell carcinoma	Immediately after nephrectomy, a sample was taken from the tumor and frozen in liquid nitrogen	total RNA	Total RNA was extracted from snap-frozen tumours using the Qiamp total RNA kit - PN 74104 -QIAGEN, Hilden, Germany after histological control.	Cy5	cRNA were amplified from 350 ng of total RNA were amplified and fluorescent cDNA were synthesis from cRNA using the kit Agilent Low RNA Input Fluorescent Linear Amplification Kit - PN 5184-3523 - Agilent Technologies	9606	750 ng of the two cDNA labelled Cyanine 3 and Cyanine 5 were hybridizated using the kit In-Situ Hybridization Kit Plus - PN 5184-3568 - Agilent Technologies	Agilent Technologies Scanner G2505B US22502565 Agilent Technologies Scanner G2505B US22502565	Images were quantified using Agilent Feature Extraction Software (version A.8.5.1.1).	Agilent Feature Extraction Software (v 8.5.1.1) was used for background subtraction and LOWESS normalization.	GPL1708	Julien,,Edeline	j.edeline@rennes.fnclcc.fr	UMR 6061	CNRS-Universit茅 Rennes1
GSM733604	Public on May 28 2011	May 27 2011	Jun 26 2011	RNA	2	Clear-cell renal cell carcinoma LU M	Homo sapiens	age at diagnosis (y): 72	t (tnm stage): 3	n (tnm stage): 0	m (tnm stage): 1	fuhrman grade: 4	renal vein involvement: 0	inferior vena cava involvement: 0	peri-nephric fat involvement: 1	sarcomatoid component: 0	tumor necrosis: 1	microvascular invasion: 1	microvascular density (mvd): 12	progression (1=yes, 0=no): 1	death (1=yes, 0=no): 1	death from cancer (1=yes, 0=no): 1	survival time: 28	tissue: Clear-cell renal cell carcinoma	Immediately after nephrectomy, a sample was taken from the tumor and frozen in liquid nitrogen	total RNA	Total RNA was extracted from snap-frozen tumours using the Qiamp total RNA kit - PN 74104 -QIAGEN, Hilden, Germany after histological control.	Cy3	cRNA were amplified from 350 ng of total RNA were amplified and fluorescent cDNA were synthesis from cRNA using the kit Agilent Low RNA Input Fluorescent Linear Amplification Kit - PN 5184-3523 - Agilent Technologies	9606	Total RNA from pooled tumor RNA samples	Homo sapiens	sample type: Total RNA from pooled tumor RNA samples	tissue: Clear-cell renal cell carcinoma	Immediately after nephrectomy, a sample was taken from the tumor and frozen in liquid nitrogen	total RNA	Total RNA was extracted from snap-frozen tumours using the Qiamp total RNA kit - PN 74104 -QIAGEN, Hilden, Germany after histological control.	Cy5	cRNA were amplified from 350 ng of total RNA were amplified and fluorescent cDNA were synthesis from cRNA using the kit Agilent Low RNA Input Fluorescent Linear Amplification Kit - PN 5184-3523 - Agilent Technologies	9606	750 ng of the two cDNA labelled Cyanine 3 and Cyanine 5 were hybridizated using the kit In-Situ Hybridization Kit Plus - PN 5184-3568 - Agilent Technologies	Agilent Technologies Scanner G2505B US22502565 Agilent Technologies Scanner G2505B US22502565	Images were quantified using Agilent Feature Extraction Software (version A.8.5.1.1).	Agilent Feature Extraction Software (v 8.5.1.1) was used for background subtraction and LOWESS normalization.	GPL1708	Julien,,Edeline	j.edeline@rennes.fnclcc.fr	UMR 6061	CNRS-Universit茅 Rennes1
GSM733605	Public on May 28 2011	May 27 2011	Jun 26 2011	RNA	2	Clear-cell renal cell carcinoma MA F	Homo sapiens	age at diagnosis (y): 77	t (tnm stage): 2	n (tnm stage): 1	m (tnm stage): 0	fuhrman grade: 4	renal vein involvement: 0	inferior vena cava involvement: 0	peri-nephric fat involvement: 0	sarcomatoid component: 0	tumor necrosis: 1	microvascular invasion: 0	microvascular density (mvd): 45	progression (1=yes, 0=no): 0	death (1=yes, 0=no): 0	death from cancer (1=yes, 0=no): 0	survival time: 41	tissue: Clear-cell renal cell carcinoma	Immediately after nephrectomy, a sample was taken from the tumor and frozen in liquid nitrogen	total RNA	Total RNA was extracted from snap-frozen tumours using the Qiamp total RNA kit - PN 74104 -QIAGEN, Hilden, Germany after histological control.	Cy3	cRNA were amplified from 350 ng of total RNA were amplified and fluorescent cDNA were synthesis from cRNA using the kit Agilent Low RNA Input Fluorescent Linear Amplification Kit - PN 5184-3523 - Agilent Technologies	9606	Total RNA from pooled tumor RNA samples	Homo sapiens	sample type: Total RNA from pooled tumor RNA samples	tissue: Clear-cell renal cell carcinoma	Immediately after nephrectomy, a sample was taken from the tumor and frozen in liquid nitrogen	total RNA	Total RNA was extracted from snap-frozen tumours using the Qiamp total RNA kit - PN 74104 -QIAGEN, Hilden, Germany after histological control.	Cy5	cRNA were amplified from 350 ng of total RNA were amplified and fluorescent cDNA were synthesis from cRNA using the kit Agilent Low RNA Input Fluorescent Linear Amplification Kit - PN 5184-3523 - Agilent Technologies	9606	750 ng of the two cDNA labelled Cyanine 3 and Cyanine 5 were hybridizated using the kit In-Situ Hybridization Kit Plus - PN 5184-3568 - Agilent Technologies	Agilent Technologies Scanner G2505B US22502565 Agilent Technologies Scanner G2505B US22502565	Images were quantified using Agilent Feature Extraction Software (version A.8.5.1.1).	Agilent Feature Extraction Software (v 8.5.1.1) was used for background subtraction and LOWESS normalization.	GPL1708	Julien,,Edeline	j.edeline@rennes.fnclcc.fr	UMR 6061	CNRS-Universit茅 Rennes1
GSM733606	Public on May 28 2011	May 27 2011	Jun 26 2011	RNA	2	Clear-cell renal cell carcinoma MO R	Homo sapiens	age at diagnosis (y): 51	t (tnm stage): 1	n (tnm stage): 0	m (tnm stage): 0	fuhrman grade: 1	renal vein involvement: 0	inferior vena cava involvement: 0	peri-nephric fat involvement: 0	sarcomatoid component: 0	tumor necrosis: 0	microvascular invasion: 0	microvascular density (mvd): 75	progression (1=yes, 0=no): 0	death (1=yes, 0=no): 0	death from cancer (1=yes, 0=no): 0	survival time: 51	tissue: Clear-cell renal cell carcinoma	Immediately after nephrectomy, a sample was taken from the tumor and frozen in liquid nitrogen	total RNA	Total RNA was extracted from snap-frozen tumours using the Qiamp total RNA kit - PN 74104 -QIAGEN, Hilden, Germany after histological control.	Cy3	cRNA were amplified from 350 ng of total RNA were amplified and fluorescent cDNA were synthesis from cRNA using the kit Agilent Low RNA Input Fluorescent Linear Amplification Kit - PN 5184-3523 - Agilent Technologies	9606	Total RNA from pooled tumor RNA samples	Homo sapiens	sample type: Total RNA from pooled tumor RNA samples	tissue: Clear-cell renal cell carcinoma	Immediately after nephrectomy, a sample was taken from the tumor and frozen in liquid nitrogen	total RNA	Total RNA was extracted from snap-frozen tumours using the Qiamp total RNA kit - PN 74104 -QIAGEN, Hilden, Germany after histological control.	Cy5	cRNA were amplified from 350 ng of total RNA were amplified and fluorescent cDNA were synthesis from cRNA using the kit Agilent Low RNA Input Fluorescent Linear Amplification Kit - PN 5184-3523 - Agilent Technologies	9606	750 ng of the two cDNA labelled Cyanine 3 and Cyanine 5 were hybridizated using the kit In-Situ Hybridization Kit Plus - PN 5184-3568 - Agilent Technologies	Agilent Technologies Scanner G2505B US22502565 Agilent Technologies Scanner G2505B US22502565	Images were quantified using Agilent Feature Extraction Software (version A.8.5.1.1).	Agilent Feature Extraction Software (v 8.5.1.1) was used for background subtraction and LOWESS normalization.	GPL1708	Julien,,Edeline	j.edeline@rennes.fnclcc.fr	UMR 6061	CNRS-Universit茅 Rennes1
GSM733607	Public on May 28 2011	May 27 2011	Jun 26 2011	RNA	2	Clear-cell renal cell carcinoma PE R	Homo sapiens	age at diagnosis (y): 75	t (tnm stage): 3	n (tnm stage): 1	m (tnm stage): 1	fuhrman grade: 4	renal vein involvement: 0	inferior vena cava involvement: 0	peri-nephric fat involvement: 1	sarcomatoid component: 1	tumor necrosis: 1	microvascular invasion: 1	microvascular density (mvd): 23	progression (1=yes, 0=no): 1	death (1=yes, 0=no): 1	death from cancer (1=yes, 0=no): 1	survival time: 20	tissue: Clear-cell renal cell carcinoma	Immediately after nephrectomy, a sample was taken from the tumor and frozen in liquid nitrogen	total RNA	Total RNA was extracted from snap-frozen tumours using the Qiamp total RNA kit - PN 74104 -QIAGEN, Hilden, Germany after histological control.	Cy3	cRNA were amplified from 350 ng of total RNA were amplified and fluorescent cDNA were synthesis from cRNA using the kit Agilent Low RNA Input Fluorescent Linear Amplification Kit - PN 5184-3523 - Agilent Technologies	9606	Total RNA from pooled tumor RNA samples	Homo sapiens	sample type: Total RNA from pooled tumor RNA samples	tissue: Clear-cell renal cell carcinoma	Immediately after nephrectomy, a sample was taken from the tumor and frozen in liquid nitrogen	total RNA	Total RNA was extracted from snap-frozen tumours using the Qiamp total RNA kit - PN 74104 -QIAGEN, Hilden, Germany after histological control.	Cy5	cRNA were amplified from 350 ng of total RNA were amplified and fluorescent cDNA were synthesis from cRNA using the kit Agilent Low RNA Input Fluorescent Linear Amplification Kit - PN 5184-3523 - Agilent Technologies	9606	750 ng of the two cDNA labelled Cyanine 3 and Cyanine 5 were hybridizated using the kit In-Situ Hybridization Kit Plus - PN 5184-3568 - Agilent Technologies	Agilent Technologies Scanner G2505B US22502565 Agilent Technologies Scanner G2505B US22502565	Images were quantified using Agilent Feature Extraction Software (version A.8.5.1.1).	Agilent Feature Extraction Software (v 8.5.1.1) was used for background subtraction and LOWESS normalization.	GPL1708	Julien,,Edeline	j.edeline@rennes.fnclcc.fr	UMR 6061	CNRS-Universit茅 Rennes1
GSM733608	Public on May 28 2011	May 27 2011	Jun 26 2011	RNA	2	Clear-cell renal cell carcinoma PI G	Homo sapiens	age at diagnosis (y): 56	t (tnm stage): 2	n (tnm stage): 0	m (tnm stage): 0	fuhrman grade: 3	renal vein involvement: 0	inferior vena cava involvement: 0	peri-nephric fat involvement: 0	sarcomatoid component: 0	tumor necrosis: 0	microvascular invasion: 0	microvascular density (mvd): 69	progression (1=yes, 0=no): 0	death (1=yes, 0=no): 0	death from cancer (1=yes, 0=no): 0	survival time: 61	tissue: Clear-cell renal cell carcinoma	Immediately after nephrectomy, a sample was taken from the tumor and frozen in liquid nitrogen	total RNA	Total RNA was extracted from snap-frozen tumours using the Qiamp total RNA kit - PN 74104 -QIAGEN, Hilden, Germany after histological control.	Cy3	cRNA were amplified from 350 ng of total RNA were amplified and fluorescent cDNA were synthesis from cRNA using the kit Agilent Low RNA Input Fluorescent Linear Amplification Kit - PN 5184-3523 - Agilent Technologies	9606	Total RNA from pooled tumor RNA samples	Homo sapiens	sample type: Total RNA from pooled tumor RNA samples	tissue: Clear-cell renal cell carcinoma	Immediately after nephrectomy, a sample was taken from the tumor and frozen in liquid nitrogen	total RNA	Total RNA was extracted from snap-frozen tumours using the Qiamp total RNA kit - PN 74104 -QIAGEN, Hilden, Germany after histological control.	Cy5	cRNA were amplified from 350 ng of total RNA were amplified and fluorescent cDNA were synthesis from cRNA using the kit Agilent Low RNA Input Fluorescent Linear Amplification Kit - PN 5184-3523 - Agilent Technologies	9606	750 ng of the two cDNA labelled Cyanine 3 and Cyanine 5 were hybridizated using the kit In-Situ Hybridization Kit Plus - PN 5184-3568 - Agilent Technologies	Agilent Technologies Scanner G2505B US22502565 Agilent Technologies Scanner G2505B US22502565	Images were quantified using Agilent Feature Extraction Software (version A.8.5.1.1).	Agilent Feature Extraction Software (v 8.5.1.1) was used for background subtraction and LOWESS normalization.	GPL1708	Julien,,Edeline	j.edeline@rennes.fnclcc.fr	UMR 6061	CNRS-Universit茅 Rennes1
GSM733609	Public on May 28 2011	May 27 2011	Jun 26 2011	RNA	2	Clear-cell renal cell carcinoma PO J	Homo sapiens	age at diagnosis (y): 77	t (tnm stage): 2	n (tnm stage): 0	m (tnm stage): 0	fuhrman grade: 2	renal vein involvement: 0	inferior vena cava involvement: 0	peri-nephric fat involvement: 0	sarcomatoid component: 0	tumor necrosis: 0	microvascular invasion: 0	microvascular density (mvd): 73	progression (1=yes, 0=no): 0	death (1=yes, 0=no): 0	death from cancer (1=yes, 0=no): 0	survival time: 50	tissue: Clear-cell renal cell carcinoma	Immediately after nephrectomy, a sample was taken from the tumor and frozen in liquid nitrogen	total RNA	Total RNA was extracted from snap-frozen tumours using the Qiamp total RNA kit - PN 74104 -QIAGEN, Hilden, Germany after histological control.	Cy3	cRNA were amplified from 350 ng of total RNA were amplified and fluorescent cDNA were synthesis from cRNA using the kit Agilent Low RNA Input Fluorescent Linear Amplification Kit - PN 5184-3523 - Agilent Technologies	9606	Total RNA from pooled tumor RNA samples	Homo sapiens	sample type: Total RNA from pooled tumor RNA samples	tissue: Clear-cell renal cell carcinoma	Immediately after nephrectomy, a sample was taken from the tumor and frozen in liquid nitrogen	total RNA	Total RNA was extracted from snap-frozen tumours using the Qiamp total RNA kit - PN 74104 -QIAGEN, Hilden, Germany after histological control.	Cy5	cRNA were amplified from 350 ng of total RNA were amplified and fluorescent cDNA were synthesis from cRNA using the kit Agilent Low RNA Input Fluorescent Linear Amplification Kit - PN 5184-3523 - Agilent Technologies	9606	750 ng of the two cDNA labelled Cyanine 3 and Cyanine 5 were hybridizated using the kit In-Situ Hybridization Kit Plus - PN 5184-3568 - Agilent Technologies	Agilent Technologies Scanner G2505B US22502565 Agilent Technologies Scanner G2505B US22502565	Images were quantified using Agilent Feature Extraction Software (version A.8.5.1.1).	Agilent Feature Extraction Software (v 8.5.1.1) was used for background subtraction and LOWESS normalization.	GPL1708	Julien,,Edeline	j.edeline@rennes.fnclcc.fr	UMR 6061	CNRS-Universit茅 Rennes1
GSM733610	Public on May 28 2011	May 27 2011	Jun 26 2011	RNA	2	Clear-cell renal cell carcinoma PR C	Homo sapiens	age at diagnosis (y): 44	t (tnm stage): 3	n (tnm stage): 2	m (tnm stage): 0	fuhrman grade: 4	renal vein involvement: 1	inferior vena cava involvement: 0	peri-nephric fat involvement: 1	sarcomatoid component: 1	tumor necrosis: 1	microvascular invasion: 1	microvascular density (mvd): 31	progression (1=yes, 0=no): 1	death (1=yes, 0=no): 1	death from cancer (1=yes, 0=no): 1	survival time: 18	tissue: Clear-cell renal cell carcinoma	Immediately after nephrectomy, a sample was taken from the tumor and frozen in liquid nitrogen	total RNA	Total RNA was extracted from snap-frozen tumours using the Qiamp total RNA kit - PN 74104 -QIAGEN, Hilden, Germany after histological control.	Cy3	cRNA were amplified from 350 ng of total RNA were amplified and fluorescent cDNA were synthesis from cRNA using the kit Agilent Low RNA Input Fluorescent Linear Amplification Kit - PN 5184-3523 - Agilent Technologies	9606	Total RNA from pooled tumor RNA samples	Homo sapiens	sample type: Total RNA from pooled tumor RNA samples	tissue: Clear-cell renal cell carcinoma	Immediately after nephrectomy, a sample was taken from the tumor and frozen in liquid nitrogen	total RNA	Total RNA was extracted from snap-frozen tumours using the Qiamp total RNA kit - PN 74104 -QIAGEN, Hilden, Germany after histological control.	Cy5	cRNA were amplified from 350 ng of total RNA were amplified and fluorescent cDNA were synthesis from cRNA using the kit Agilent Low RNA Input Fluorescent Linear Amplification Kit - PN 5184-3523 - Agilent Technologies	9606	750 ng of the two cDNA labelled Cyanine 3 and Cyanine 5 were hybridizated using the kit In-Situ Hybridization Kit Plus - PN 5184-3568 - Agilent Technologies	Agilent Technologies Scanner G2505B US22502565 Agilent Technologies Scanner G2505B US22502565	Images were quantified using Agilent Feature Extraction Software (version A.8.5.1.1).	Agilent Feature Extraction Software (v 8.5.1.1) was used for background subtraction and LOWESS normalization.	GPL1708	Julien,,Edeline	j.edeline@rennes.fnclcc.fr	UMR 6061	CNRS-Universit茅 Rennes1
GSM733611	Public on May 28 2011	May 27 2011	Jun 26 2011	RNA	2	Clear-cell renal cell carcinoma RI J	Homo sapiens	age at diagnosis (y): 61	t (tnm stage): 3	n (tnm stage): 0	m (tnm stage): 0	fuhrman grade: 3	renal vein involvement: 0	inferior vena cava involvement: 0	peri-nephric fat involvement: 1	sarcomatoid component: 0	tumor necrosis: 1	microvascular invasion: 0	progression (1=yes, 0=no): 0	death (1=yes, 0=no): 1	death from cancer (1=yes, 0=no): 0	survival time: 13	tissue: Clear-cell renal cell carcinoma		Immediately after nephrectomy, a sample was taken from the tumor and frozen in liquid nitrogen	total RNA	Total RNA was extracted from snap-frozen tumours using the Qiamp total RNA kit - PN 74104 -QIAGEN, Hilden, Germany after histological control.	Cy3	cRNA were amplified from 350 ng of total RNA were amplified and fluorescent cDNA were synthesis from cRNA using the kit Agilent Low RNA Input Fluorescent Linear Amplification Kit - PN 5184-3523 - Agilent Technologies	9606	Total RNA from pooled tumor RNA samples	Homo sapiens	sample type: Total RNA from pooled tumor RNA samples	tissue: Clear-cell renal cell carcinoma	Immediately after nephrectomy, a sample was taken from the tumor and frozen in liquid nitrogen	total RNA	Total RNA was extracted from snap-frozen tumours using the Qiamp total RNA kit - PN 74104 -QIAGEN, Hilden, Germany after histological control.	Cy5	cRNA were amplified from 350 ng of total RNA were amplified and fluorescent cDNA were synthesis from cRNA using the kit Agilent Low RNA Input Fluorescent Linear Amplification Kit - PN 5184-3523 - Agilent Technologies	9606	750 ng of the two cDNA labelled Cyanine 3 and Cyanine 5 were hybridizated using the kit In-Situ Hybridization Kit Plus - PN 5184-3568 - Agilent Technologies	Agilent Technologies Scanner G2505B US22502565 Agilent Technologies Scanner G2505B US22502565	Images were quantified using Agilent Feature Extraction Software (version A.8.5.1.1).	Agilent Feature Extraction Software (v 8.5.1.1) was used for background subtraction and LOWESS normalization.	GPL1708	Julien,,Edeline	j.edeline@rennes.fnclcc.fr	UMR 6061	CNRS-Universit茅 Rennes1
GSM733612	Public on May 28 2011	May 27 2011	Jun 26 2011	RNA	2	Clear-cell renal cell carcinoma RI P	Homo sapiens	age at diagnosis (y): 75	t (tnm stage): 3	n (tnm stage): 1	m (tnm stage): 1	fuhrman grade: 4	renal vein involvement: 1	inferior vena cava involvement: 0	peri-nephric fat involvement: 1	sarcomatoid component: 0	tumor necrosis: 1	microvascular invasion: 1	microvascular density (mvd): 59	progression (1=yes, 0=no): 1	death (1=yes, 0=no): 1	death from cancer (1=yes, 0=no): 1	survival time: 2	tissue: Clear-cell renal cell carcinoma	Immediately after nephrectomy, a sample was taken from the tumor and frozen in liquid nitrogen	total RNA	Total RNA was extracted from snap-frozen tumours using the Qiamp total RNA kit - PN 74104 -QIAGEN, Hilden, Germany after histological control.	Cy3	cRNA were amplified from 350 ng of total RNA were amplified and fluorescent cDNA were synthesis from cRNA using the kit Agilent Low RNA Input Fluorescent Linear Amplification Kit - PN 5184-3523 - Agilent Technologies	9606	Total RNA from pooled tumor RNA samples	Homo sapiens	sample type: Total RNA from pooled tumor RNA samples	tissue: Clear-cell renal cell carcinoma	Immediately after nephrectomy, a sample was taken from the tumor and frozen in liquid nitrogen	total RNA	Total RNA was extracted from snap-frozen tumours using the Qiamp total RNA kit - PN 74104 -QIAGEN, Hilden, Germany after histological control.	Cy5	cRNA were amplified from 350 ng of total RNA were amplified and fluorescent cDNA were synthesis from cRNA using the kit Agilent Low RNA Input Fluorescent Linear Amplification Kit - PN 5184-3523 - Agilent Technologies	9606	750 ng of the two cDNA labelled Cyanine 3 and Cyanine 5 were hybridizated using the kit In-Situ Hybridization Kit Plus - PN 5184-3568 - Agilent Technologies	Agilent Technologies Scanner G2505B US22502565 Agilent Technologies Scanner G2505B US22502565	Images were quantified using Agilent Feature Extraction Software (version A.8.5.1.1).	Agilent Feature Extraction Software (v 8.5.1.1) was used for background subtraction and LOWESS normalization.	GPL1708	Julien,,Edeline	j.edeline@rennes.fnclcc.fr	UMR 6061	CNRS-Universit茅 Rennes1
GSM733613	Public on May 28 2011	May 27 2011	Jun 26 2011	RNA	2	Clear-cell renal cell carcinoma RO A	Homo sapiens	age at diagnosis (y): 78	t (tnm stage): 3	n (tnm stage): 0	m (tnm stage): 0	fuhrman grade: 2	renal vein involvement: 0	inferior vena cava involvement: 0	peri-nephric fat involvement: 1	sarcomatoid component: 0	tumor necrosis: 0	microvascular invasion: 1	microvascular density (mvd): 43	progression (1=yes, 0=no): 1	death (1=yes, 0=no): 0	death from cancer (1=yes, 0=no): 0	survival time: 57	tissue: Clear-cell renal cell carcinoma	Immediately after nephrectomy, a sample was taken from the tumor and frozen in liquid nitrogen	total RNA	Total RNA was extracted from snap-frozen tumours using the Qiamp total RNA kit - PN 74104 -QIAGEN, Hilden, Germany after histological control.	Cy3	cRNA were amplified from 350 ng of total RNA were amplified and fluorescent cDNA were synthesis from cRNA using the kit Agilent Low RNA Input Fluorescent Linear Amplification Kit - PN 5184-3523 - Agilent Technologies	9606	Total RNA from pooled tumor RNA samples	Homo sapiens	sample type: Total RNA from pooled tumor RNA samples	tissue: Clear-cell renal cell carcinoma	Immediately after nephrectomy, a sample was taken from the tumor and frozen in liquid nitrogen	total RNA	Total RNA was extracted from snap-frozen tumours using the Qiamp total RNA kit - PN 74104 -QIAGEN, Hilden, Germany after histological control.	Cy5	cRNA were amplified from 350 ng of total RNA were amplified and fluorescent cDNA were synthesis from cRNA using the kit Agilent Low RNA Input Fluorescent Linear Amplification Kit - PN 5184-3523 - Agilent Technologies	9606	750 ng of the two cDNA labelled Cyanine 3 and Cyanine 5 were hybridizated using the kit In-Situ Hybridization Kit Plus - PN 5184-3568 - Agilent Technologies	Agilent Technologies Scanner G2505B US22502565 Agilent Technologies Scanner G2505B US22502565	Images were quantified using Agilent Feature Extraction Software (version A.8.5.1.1).	Agilent Feature Extraction Software (v 8.5.1.1) was used for background subtraction and LOWESS normalization.	GPL1708	Julien,,Edeline	j.edeline@rennes.fnclcc.fr	UMR 6061	CNRS-Universit茅 Rennes1
GSM733614	Public on May 28 2011	May 27 2011	Jun 26 2011	RNA	2	Clear-cell renal cell carcinoma RO G	Homo sapiens	age at diagnosis (y): 65	t (tnm stage): 3	n (tnm stage): 0	m (tnm stage): 1	fuhrman grade: 3	renal vein involvement: 0	inferior vena cava involvement: 0	peri-nephric fat involvement: 1	sarcomatoid component: 0	tumor necrosis: 1	microvascular invasion: 0	microvascular density (mvd): 82	progression (1=yes, 0=no): 1	death (1=yes, 0=no): 1	death from cancer (1=yes, 0=no): 1	survival time: 19	tissue: Clear-cell renal cell carcinoma	Immediately after nephrectomy, a sample was taken from the tumor and frozen in liquid nitrogen	total RNA	Total RNA was extracted from snap-frozen tumours using the Qiamp total RNA kit - PN 74104 -QIAGEN, Hilden, Germany after histological control.	Cy3	cRNA were amplified from 350 ng of total RNA were amplified and fluorescent cDNA were synthesis from cRNA using the kit Agilent Low RNA Input Fluorescent Linear Amplification Kit - PN 5184-3523 - Agilent Technologies	9606	Total RNA from pooled tumor RNA samples	Homo sapiens	sample type: Total RNA from pooled tumor RNA samples	tissue: Clear-cell renal cell carcinoma	Immediately after nephrectomy, a sample was taken from the tumor and frozen in liquid nitrogen	total RNA	Total RNA was extracted from snap-frozen tumours using the Qiamp total RNA kit - PN 74104 -QIAGEN, Hilden, Germany after histological control.	Cy5	cRNA were amplified from 350 ng of total RNA were amplified and fluorescent cDNA were synthesis from cRNA using the kit Agilent Low RNA Input Fluorescent Linear Amplification Kit - PN 5184-3523 - Agilent Technologies	9606	750 ng of the two cDNA labelled Cyanine 3 and Cyanine 5 were hybridizated using the kit In-Situ Hybridization Kit Plus - PN 5184-3568 - Agilent Technologies	Agilent Technologies Scanner G2505B US22502565 Agilent Technologies Scanner G2505B US22502565	Images were quantified using Agilent Feature Extraction Software (version A.8.5.1.1).	Agilent Feature Extraction Software (v 8.5.1.1) was used for background subtraction and LOWESS normalization.	GPL1708	Julien,,Edeline	j.edeline@rennes.fnclcc.fr	UMR 6061	CNRS-Universit茅 Rennes1
GSM733615	Public on May 28 2011	May 27 2011	Jun 26 2011	RNA	2	Clear-cell renal cell carcinoma ST M	Homo sapiens	age at diagnosis (y): 55	t (tnm stage): 2	n (tnm stage): 0	m (tnm stage): 0	fuhrman grade: 4	renal vein involvement: 0	inferior vena cava involvement: 0	peri-nephric fat involvement: 0	sarcomatoid component: 0	tumor necrosis: 1	microvascular invasion: 0	microvascular density (mvd): 23	progression (1=yes, 0=no): 1	death (1=yes, 0=no): 0	death from cancer (1=yes, 0=no): 0	survival time: 76	tissue: Clear-cell renal cell carcinoma	Immediately after nephrectomy, a sample was taken from the tumor and frozen in liquid nitrogen	total RNA	Total RNA was extracted from snap-frozen tumours using the Qiamp total RNA kit - PN 74104 -QIAGEN, Hilden, Germany after histological control.	Cy3	cRNA were amplified from 350 ng of total RNA were amplified and fluorescent cDNA were synthesis from cRNA using the kit Agilent Low RNA Input Fluorescent Linear Amplification Kit - PN 5184-3523 - Agilent Technologies	9606	Total RNA from pooled tumor RNA samples	Homo sapiens	sample type: Total RNA from pooled tumor RNA samples	tissue: Clear-cell renal cell carcinoma	Immediately after nephrectomy, a sample was taken from the tumor and frozen in liquid nitrogen	total RNA	Total RNA was extracted from snap-frozen tumours using the Qiamp total RNA kit - PN 74104 -QIAGEN, Hilden, Germany after histological control.	Cy5	cRNA were amplified from 350 ng of total RNA were amplified and fluorescent cDNA were synthesis from cRNA using the kit Agilent Low RNA Input Fluorescent Linear Amplification Kit - PN 5184-3523 - Agilent Technologies	9606	750 ng of the two cDNA labelled Cyanine 3 and Cyanine 5 were hybridizated using the kit In-Situ Hybridization Kit Plus - PN 5184-3568 - Agilent Technologies	Agilent Technologies Scanner G2505B US22502565 Agilent Technologies Scanner G2505B US22502565	Images were quantified using Agilent Feature Extraction Software (version A.8.5.1.1).	Agilent Feature Extraction Software (v 8.5.1.1) was used for background subtraction and LOWESS normalization.	GPL1708	Julien,,Edeline	j.edeline@rennes.fnclcc.fr	UMR 6061	CNRS-Universit茅 Rennes1
GSM733616	Public on May 28 2011	May 27 2011	Jun 26 2011	RNA	2	Clear-cell renal cell carcinoma TE M	Homo sapiens	age at diagnosis (y): 65	t (tnm stage): 1	n (tnm stage): 0	m (tnm stage): 0	fuhrman grade: 2	renal vein involvement: 0	peri-nephric fat involvement: 0	sarcomatoid component: 0	tumor necrosis: 0	microvascular invasion: 0	microvascular density (mvd): 68	progression (1=yes, 0=no): 0	death (1=yes, 0=no): 0	death from cancer (1=yes, 0=no): 0	survival time: 56	tissue: Clear-cell renal cell carcinoma		Immediately after nephrectomy, a sample was taken from the tumor and frozen in liquid nitrogen	total RNA	Total RNA was extracted from snap-frozen tumours using the Qiamp total RNA kit - PN 74104 -QIAGEN, Hilden, Germany after histological control.	Cy3	cRNA were amplified from 350 ng of total RNA were amplified and fluorescent cDNA were synthesis from cRNA using the kit Agilent Low RNA Input Fluorescent Linear Amplification Kit - PN 5184-3523 - Agilent Technologies	9606	Total RNA from pooled tumor RNA samples	Homo sapiens	sample type: Total RNA from pooled tumor RNA samples	tissue: Clear-cell renal cell carcinoma	Immediately after nephrectomy, a sample was taken from the tumor and frozen in liquid nitrogen	total RNA	Total RNA was extracted from snap-frozen tumours using the Qiamp total RNA kit - PN 74104 -QIAGEN, Hilden, Germany after histological control.	Cy5	cRNA were amplified from 350 ng of total RNA were amplified and fluorescent cDNA were synthesis from cRNA using the kit Agilent Low RNA Input Fluorescent Linear Amplification Kit - PN 5184-3523 - Agilent Technologies	9606	750 ng of the two cDNA labelled Cyanine 3 and Cyanine 5 were hybridizated using the kit In-Situ Hybridization Kit Plus - PN 5184-3568 - Agilent Technologies	Agilent Technologies Scanner G2505B US22502565 Agilent Technologies Scanner G2505B US22502565	Images were quantified using Agilent Feature Extraction Software (version A.8.5.1.1).	Agilent Feature Extraction Software (v 8.5.1.1) was used for background subtraction and LOWESS normalization.	GPL1708	Julien,,Edeline	j.edeline@rennes.fnclcc.fr	UMR 6061	CNRS-Universit茅 Rennes1
GSM733617	Public on May 28 2011	May 27 2011	Jun 26 2011	RNA	2	Clear-cell renal cell carcinoma TH M	Homo sapiens	age at diagnosis (y): 78	t (tnm stage): 3	n (tnm stage): 2	m (tnm stage): 0	fuhrman grade: 4	renal vein involvement: 1	inferior vena cava involvement: 0	peri-nephric fat involvement: 1	sarcomatoid component: 0	tumor necrosis: 1	microvascular invasion: 1	progression (1=yes, 0=no): 1	death (1=yes, 0=no): 1	death from cancer (1=yes, 0=no): 1	survival time: 8	tissue: Clear-cell renal cell carcinoma		Immediately after nephrectomy, a sample was taken from the tumor and frozen in liquid nitrogen	total RNA	Total RNA was extracted from snap-frozen tumours using the Qiamp total RNA kit - PN 74104 -QIAGEN, Hilden, Germany after histological control.	Cy3	cRNA were amplified from 350 ng of total RNA were amplified and fluorescent cDNA were synthesis from cRNA using the kit Agilent Low RNA Input Fluorescent Linear Amplification Kit - PN 5184-3523 - Agilent Technologies	9606	Total RNA from pooled tumor RNA samples	Homo sapiens	sample type: Total RNA from pooled tumor RNA samples	tissue: Clear-cell renal cell carcinoma	Immediately after nephrectomy, a sample was taken from the tumor and frozen in liquid nitrogen	total RNA	Total RNA was extracted from snap-frozen tumours using the Qiamp total RNA kit - PN 74104 -QIAGEN, Hilden, Germany after histological control.	Cy5	cRNA were amplified from 350 ng of total RNA were amplified and fluorescent cDNA were synthesis from cRNA using the kit Agilent Low RNA Input Fluorescent Linear Amplification Kit - PN 5184-3523 - Agilent Technologies	9606	750 ng of the two cDNA labelled Cyanine 3 and Cyanine 5 were hybridizated using the kit In-Situ Hybridization Kit Plus - PN 5184-3568 - Agilent Technologies	Agilent Technologies Scanner G2505B US22502565 Agilent Technologies Scanner G2505B US22502565	Images were quantified using Agilent Feature Extraction Software (version A.8.5.1.1).	Agilent Feature Extraction Software (v 8.5.1.1) was used for background subtraction and LOWESS normalization.	GPL1708	Julien,,Edeline	j.edeline@rennes.fnclcc.fr	UMR 6061	CNRS-Universit茅 Rennes1
[truncated: 6 more columns]
